# Supplementary material
Source: PubMed Central journal article supplement (PMC3349983)
Supplement: supp_jn.111.150060_nut150060-STable1.pdf [file supp_jn.111.150060_nut150060-STable1.pdf]

Supplemental Table 1. Equations used to calculate designated quantities.

1. Number of repeated visits ( $k$ ) needed to obtain a specified level of correlation coefficient between the observed and true mean

$$k = \frac{\sigma_w^2}{\sigma_b^2} \times \frac{r^2}{1 - r^2}$$

$\sigma_w^2$  = within - household variance

$\sigma_b^2$  = between - household variance

$r$  = correlation coefficient between the observed and the true mean

2. Number of repeated visits ( $k$ ) needed to estimate a household's food/pantry amount with a specified degree of error:

$$k = \left( Z_{\alpha/2} CV_w / D_0 \right)^2$$

$CV_w$  = within-household coefficient of variation

$D_0$  = the specified limit (as a percentage of deviation from the true intake)

3. Number of households needed for  $k$  (fixed) repeated visits:

$$n = \frac{2\sigma^2}{\delta^2} \left[ \frac{1+(k-1)\rho}{k} \right] (Z_{\alpha/2} + Z_{\beta})^2 = 2p_{sd}^2 \left[ \frac{1+(k-1)\rho}{k} \right] (Z_{\alpha/2} + Z_{\beta})^2$$

$\rho$  = intraclass correlation coefficient (ICC)

$\delta$  = effect size

$\sigma^2$  = total variance, sum of within and between variances

$p_{sd}$  = inverse of % of standard deviation. E.g. if  $\delta=0.5$  SD then  $p_{sd}=2$ .
